# Supplementary figures and images for: Chromosome-scale assemblies of Acanthamoeba castellanii genomes provide insights into Legionella pneumophila infection–related chromatin reorganization
Source: HighWire-hosted journal article supplement (doi:10.1101/gr.276375.121), 2022-09-01

A. castellanii str. C3 regions with no mapping in Neff  
(only 50 largest scaffolds shown)

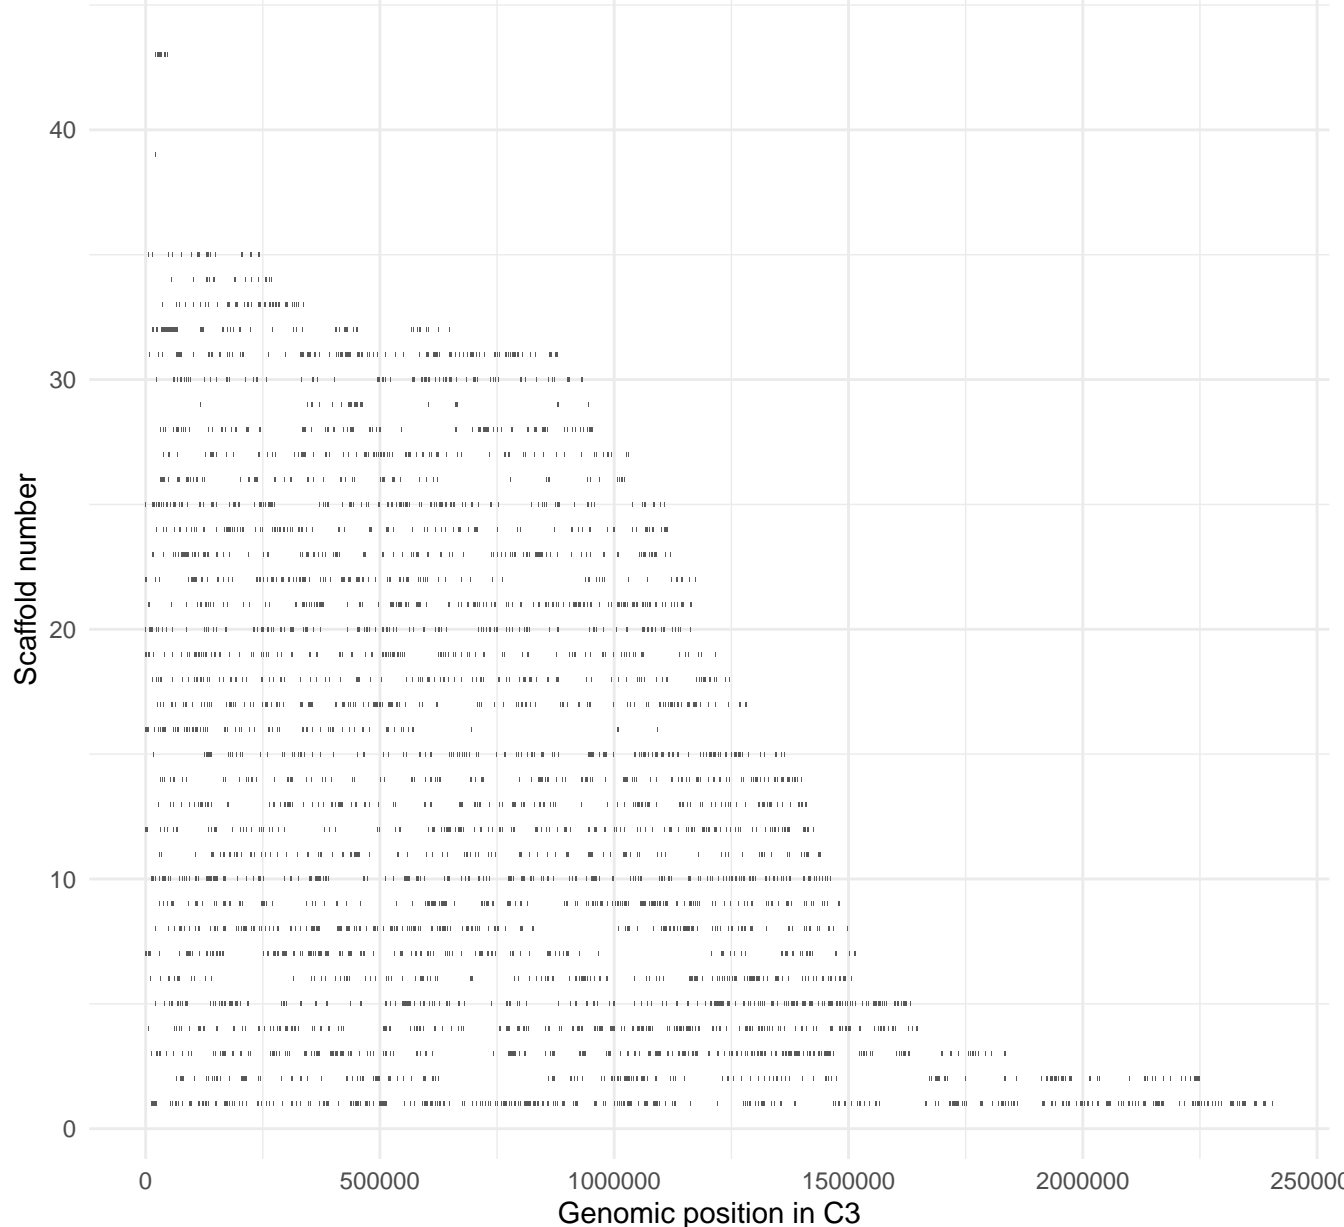

Supplement: Supplemental_Code.gz [file supp_fig_C3_excl_regions.pdf › codes/C3_exclusive_regions/supp_fig_C3_excl_regions.pdf]
